# Supplementary material
Source: publisher figshare collection journal article supplement (https://rs.figshare.com/ndownloader/files/15459143)
Supplement: Supplementary file 1 [file 15459143]

## Sheet: Metadata_tadpoles_water_summary
Species	Type	bromeliad	treatment	Bd_ZGE	mass_g	ph	chlorophyll	turbidity	microeukaryotes	observed_otus	inhibitory	PD_whole_tree	jaccard_distance	PCO1	PCO2
Ololygon alcatraz	tadpole	1	natural_arthro	159.279	0.003	na	na	na	na	136	na	10.5968	0.539746	-0.111448	0.118411
Ololygon alcatraz	tadpole	2	natural_arthro	309.774	0.01	na	na	na	na	112	na	9.29389	0.511588	-0.208206	0.21153
Ololygon alcatraz	tadpole	4	natural_arthro	25.6674	0.028	na	na	na	na	97	na	8.00262	0.470095	-0.334785	0.210743
Ololygon alcatraz	tadpole	5	natural_arthro	130.068	0.026	na	na	na	na	81	na	7.64805	0.45876	-0.321902	0.20193
Ololygon alcatraz	tadpole	6	natural_arthro	111.068	0.022	na	na	na	na	78	na	7.1974	0.425833	-0.340064	0.235447
Ololygon alcatraz	tadpole	7	natural_arthro	48.9025	0.013	na	na	na	na	62	na	7.09561	0.515127	-0.340035	0.0860505
Ololygon alcatraz	tadpole	8	natural_arthro	15.1706	0.024	na	na	na	na	83	na	7.19379	0.470563	-0.261222	0.232961
Ololygon alcatraz	tadpole	9	natural_arthro	231.252	0.02	na	na	na	na	65	na	5.32407	0.514417	-0.324745	0.0237129
Ololygon alcatraz	tadpole	10	natural_arthro	31.2232	0.013	na	na	na	na	69	na	6.69857	0.458702	-0.346312	0.130166
Ololygon alcatraz	tadpole	11	natural_arthro	47.5643	0.02	na	na	na	na	75	na	7.90633	0.443958	-0.319284	0.160425
Ololygon alcatraz	tadpole	13	sterilized_arthro	29.1758	0.009	na	na	na	na	50	na	5.03536	0.513789	-0.350022	0.0804978
Ololygon alcatraz	tadpole	14	sterilized_arthro	26.8235	0.03	na	na	na	na	57	na	4.65709	0.496443	-0.332362	-0.10681
Ololygon alcatraz	tadpole	15	sterilized_arthro	56.0065	0.025	na	na	na	na	42	na	5.04201	0.525656	-0.349365	-0.12207
Ololygon alcatraz	tadpole	16	sterilized_arthro	41.7664	0.039	na	na	na	na	45	na	4.57337	0.484454	-0.284803	-0.141224
Ololygon alcatraz	tadpole	17	sterilized_arthro	87.0097	0.029	na	na	na	na	47	na	4.58185	0.537242	-0.3382	-0.0936891
Ololygon alcatraz	tadpole	19	sterilized_arthro	1.79748	0.024	na	na	na	na	76	na	7.60178	0.498432	-0.179083	-0.0266882
Ololygon alcatraz	tadpole	20	sterilized_arthro	66.0374	0.024	na	na	na	na	57	na	4.81342	0.494065	-0.311589	-0.125599
Ololygon alcatraz	tadpole	21	sterilized_arthro	49.3098	0.011	na	na	na	na	108	na	9.47243	0.558826	0.0297428	-0.0709077
Ololygon alcatraz	tadpole	22	sterilized_arthro	93.5419	0.018	na	na	na	na	87	na	8.04412	0.562311	-0.0229016	-0.0593423
Ololygon alcatraz	tadpole	23	sterilized_arthro	33.2032	0.033	na	na	na	na	73	na	7.39452	0.520682	-0.20942	-0.110438
Ololygon alcatraz	tadpole	25	natural	96.6953	0.026	na	na	na	na	94	na	8.64731	0.498464	-0.140664	0.0334306
Ololygon alcatraz	tadpole	26	natural	459.62	0.014	na	na	na	na	165	na	14.2895	0.526395	0.0823729	0.091216
Ololygon alcatraz	tadpole	27	natural	134.78	0.016	na	na	na	na	123	na	10.7905	0.533422	-0.00981764	0.0800145
Ololygon alcatraz	tadpole	28	natural	192.444	0.025	na	na	na	na	142	na	10.9559	0.542876	-0.00509921	-0.0557436
Ololygon alcatraz	tadpole	29	natural	180.076	0.021	na	na	na	na	90	na	8.51776	0.497022	-0.124819	0.0202678
Ololygon alcatraz	tadpole	30	natural	45.7008	0.022	na	na	na	na	62	na	6.31095	0.528502	-0.2462	-0.0144666
Ololygon alcatraz	tadpole	31	natural	58.1236	0.018	na	na	na	na	85	na	8.03667	0.551517	-0.17507	-0.0464153
Ololygon alcatraz	tadpole	32	natural	145.925	0.011	na	na	na	na	142	na	12.4003	0.56115	0.0558271	0.0871922
Ololygon alcatraz	tadpole	33	natural	140.055	0.006	na	na	na	na	195	na	13.7993	0.547503	0.133452	0.0924108
Ololygon alcatraz	tadpole	34	natural	88.3199	0.019	na	na	na	na	72	na	6.66264	0.545161	-0.270819	0.0282898
Ololygon alcatraz	tadpole	35	natural	590.813	0.012	na	na	na	na	190	na	13.9871	0.559025	0.102623	0.0728889
Ololygon alcatraz	tadpole	36	natural	95.7275	0.013	na	na	na	na	99	na	9.44959	0.501735	-0.128918	0.1059
Ololygon alcatraz	tadpole	38	sterilized	128.119	0.033	na	na	na	na	71	na	5.88513	0.539823	-0.385179	0.200579
Ololygon alcatraz	tadpole	39	sterilized	46.6223	0.035	na	na	na	na	44	na	5.02553	0.493491	-0.347411	-0.0344809
Ololygon alcatraz	tadpole	40	sterilized	32.0497	0.015	na	na	na	na	55	na	5.28801	0.484812	-0.225108	-0.268769
Ololygon alcatraz	tadpole	42	sterilized	56.5365	0.031	na	na	na	na	65	na	7.63966	0.505354	-0.251818	0.0485477
Ololygon alcatraz	tadpole	43	sterilized	7.47606	0.023	na	na	na	na	60	na	5.26625	0.50224	-0.25216	-0.166601
Ololygon alcatraz	tadpole	44	sterilized	332.898	0.011	na	na	na	na	128	na	10.7775	0.555138	-0.202729	0.151881
Ololygon alcatraz	tadpole	45	sterilized	9.88067	0.031	na	na	na	na	50	na	3.92455	0.521073	-0.196494	-0.249173
Ololygon alcatraz	tadpole	46	sterilized	8.7613	0.02	na	na	na	na	52	na	5.58544	0.56799	-0.201001	-0.273522
Ololygon alcatraz	tadpole	47	sterilized	85.6533	0.017	na	na	na	na	75	na	7.16638	0.560219	-0.105786	-0.250682
Ololygon alcatraz	tadpole	48	sterilized	53.6992	0.038	na	na	na	na	42	na	3.21087	0.544937	-0.299421	-0.223783
Ololygon alcatraz	environmental	1	natural_arthro	223.56	na	6.2	79.58	7.101	300	225	19	14.72	na	0.273734	0.00455222
Ololygon alcatraz	environmental	2	natural_arthro	245.25	na	6.5	99.34	0.842	90	314	33	17.2283	na	0.336491	0.0338722
Ololygon alcatraz	environmental	3	natural_arthro	na	na	na	na	na	na	279	28	15.504	na	0.327039	0.0501523
Ololygon alcatraz	environmental	4	natural_arthro	2302.6	na	5.8	140.1	2.128	1670	240	30	14.8558	na	0.303874	0.075341
Ololygon alcatraz	environmental	5	natural_arthro	11.4619	na	4.7	208.2	2.741	80	283	34	15.4095	na	0.296206	0.0756319
Ololygon alcatraz	environmental	6	natural_arthro	17.5278	na	5.4	241.3	1.654	350	294	38	15.3189	na	0.324603	0.066099
Ololygon alcatraz	environmental	7	natural_arthro	74.9583	na	5.1	722.1	1.328	1140	294	27	17.1062	na	0.33576	0.0234445
Ololygon alcatraz	environmental	8	natural_arthro	6.30778	na	6	154.6	0.679	790	238	30	12.778	na	0.337616	0.0414643
Ololygon alcatraz	environmental	9	natural_arthro	na	na	5.7	266	2.148	20	190	29	11.9214	na	0.235784	0.0825156
Ololygon alcatraz	environmental	10	natural_arthro	41.898	na	5.5	103.4	5.975	1250	184	30	9.42374	na	0.301807	-0.0123741
Ololygon alcatraz	environmental	11	natural_arthro	2.3579	na	5.6	188	1.394	100	261	35	14.4743	na	0.328678	0.0110763
Ololygon alcatraz	environmental	13	sterilized_arthro	1169.15	na	5.7	47.2	2.173	na	157	35	9.85356	na	0.222157	-0.0673874
Ololygon alcatraz	environmental	14	sterilized_arthro	49.0238	na	5.6	54.65	1.777	na	197	26	11.7853	na	0.271479	-0.0620137
Ololygon alcatraz	environmental	15	sterilized_arthro	1.05917	na	5.4	96.42	1.174	na	190	40	9.59489	na	0.230675	-0.0556767
Ololygon alcatraz	environmental	18	sterilized_arthro	na	na	na	na	na	na	79	13	6.82024	na	0.0142593	-0.192648
Ololygon alcatraz	environmental	19	sterilized_arthro	389.857	na	5.7	152.6	2.258	na	252	32	15.9108	na	0.274212	-0.00088763
Ololygon alcatraz	environmental	20	sterilized_arthro	119.811	na	5.1	230.14	7.22	na	151	21	9.54774	na	0.207997	-0.0545378
Ololygon alcatraz	environmental	22	sterilized_arthro	43.3742	na	6	237.4	3.244	na	245	38	14.1156	na	0.292938	-0.00639156
Ololygon alcatraz	environmental	23	sterilized_arthro	132.704	na	5.2	na	na	na	215	32	12.9576	na	0.30022	-0.0512732
Ololygon alcatraz	environmental	25	natural	116.72	na	5.9	229.3	2.67	1840	264	27	16.4808	na	0.313482	0.0780557
Ololygon alcatraz	environmental	26	natural	901.802	na	6	746.3	7.938	170	330	28	18.4411	na	0.305663	0.0663293
Ololygon alcatraz	environmental	27	natural	408.494	na	6	196.3	5.292	1800	219	28	12.6404	na	0.289657	-0.0288371
Ololygon alcatraz	environmental	30	natural	372.713	na	4.6	133.1	1.512	260	283	30	16.4484	na	0.306165	0.0454143
Ololygon alcatraz	environmental	31	natural	472.639	na	5.3	240.3	6.738	1910	219	27	13.8662	na	0.221543	-0.0162012
Ololygon alcatraz	environmental	34	natural	163.716	na	5.7	223.4	6.655	7690	261	20	17.3909	na	0.323968	0.0747524
Ololygon alcatraz	environmental	35	natural	595.134	na	6.1	803.8	13.65	6060	262	30	15.6313	na	0.2944	0.0612045
Ololygon alcatraz	environmental	36	natural	145.236	na	5.7	116.9	3.222	1020	202	17	13.6427	na	0.274441	0.0312924
Ololygon alcatraz	environmental	38	sterilized	401.105	na	5.5			na	141	20	9.72418	na	0.176778	-0.13788
Ololygon alcatraz	environmental	44	sterilized	13.2084	na	5.9	109.8	2.628	na	135	17	11.5088	na	0.123629	0.00027175
Ololygon alcatraz	environmental	45	sterilized	2403.55	na	6	89.75	2.777	na	149	16	9.64897	na	0.188956	-0.129313
Ololygon alcatraz	environmental	46	sterilized	859.774	na	4.8	47.13	2.275	na	148	26	10.5878	na	0.132523	-0.103147
Ololygon alcatraz	environmental	47	sterilized	579.372	na	4.3	78.14	4.35	na	108	20	9.47828	na	0.136106	-0.0919326
Ololygon alcatraz	environmental	48	sterilized	1210.9	na	4.8	76.16	8.288	na	165	25	10.4194	na	0.147403	-0.0750552
